# Supplementary material for: Catalytic asymmetric hydrogenation in a room temperature ionic liquid using chiral Rh-complex of ionic liquid grafted 1,4-bisphosphine ligandElectronic supplementary information (ESI) available: experimental details. See http://www.rsc.org/suppdata/cc/b3/b309304b/
Source: Royal Society of Chemistry journal article supplement (doi:10.1039/b309304b), 2003-01-01
Supplement: b309304b.doc [file b309304b.doc]

Catalytic asymmetric hydrogenation in a room temperature ionic liquid using chiral Rh-complex of ionic liquid grafted 1,4-bisphosphine ligand

Sang-gi Leea* Yong Jian Zhang,a,b Piao Zing Yu,a Hyeon Yoon,c Choong Eui Song,a Jung Hoon Choi,b Jongki Hong,c

a Life Sciences Division, Korea Institute of Science and Technology, P.O. Box 131, Cheongryang, Seoul 130-650, Korea. E-mail: sanggi@kist.re.kr

b Department of Chemistry, Hanyang University, Seoul 133-791, Korea.

c Hazardous Substance Research Team, Korea Basic Science Institute, Seoul 136-701, Korea

### Electronic Supplementary Information

**General**

All reactions and manipulations were performed in a nitrogen atmosphere using standard Schelenk techniques. The reaction solvents were distilled prior to used. All purchased reagents were used without further purification. Anhydrous solvents were transferred by oven-dried syringe. Flasks were flames dried under a stream of nitrogen. The NMR spectra were recorded at 300 MHz (1H), 75.5 MHz (13C) and 121 MHz (31P). The chemical shifts were relative to TMS (as an internal reference) for 1H NMR and P(O)(OPh)3 (as an external reference) for 31P NMR.

**(4*S*,5*S*)-4,5-Bis(benzyloxymethyl)-*N,N’*-bis(4-chlorobutyl)imidazolidin-2-one**

A solution of 4,5-bis(benzyloxymethyl)imidazolidin-2-one (0.6 g, 1.84 mmol) in THF (5 mL) was added to a suspension of sodium hydride (0.12 g, 95%, 4.60 mmol) in THF (20 mL) at 0 °C, and the mixture was stirred for 20 min. To this reaction mixture was added 1-bromo-4-chlorobutane (0.85 mL, 7.35 mmol) at 0 °C. The reaction mixture was refluxed for 12 h. The reaction was quenched by addition of water, and the organic compounds were extracted with methylene chloride (15 mL x 3). The combined organic layer was washed with water, brine, and dried over MgSO4. After evaporation of the solvent, the residue was purified by column chromatography on silica gel (ethyl acetate: hexane = 1:2) to give the pure product (0.85 g, 91%) as oil.

[α]25D = +10.3 (*c* = 1.48 in chloroform); 1H NMR (300 MHz, CDCl3) δ 1.64 (m, 4H), 1.71 (m, 4H), 3.09 (m 2H), 3.40-3.52 (m, 12H), 4.53 (s, 4H), 7.28-7.39 (m, 10H); 13C NMR (75.5 MHz, CDCl3) δ 24.91, 29.45, 40.99, 44.75, 55.76, 70.57, 73.37, 127.61, 127.78, 128.39, 137.58, 159.97; HRMS Calcd. for C27H37Cl2N2O3: 507.2181. Found: 507.2186.

**(4*S*,5*S*)-4,5-Bis(benzyloxymethyl)-*N,N’*-bis[4-(2-methylimidazol-1-yl)butyl]imidazolidin-2-one (4)**

To a suspension of sodium hydride (22 mg, 8.57 mmol) in DMF (5 mL) was added a solution of 2-methylimidazole (0.7 g, 8.57 mmol) in DMF (10 mL) at 0 oC. After 2 h stirring at room temperature, a solution of (4*S*,5*S*)-4,5-dibenzyloxymethyl-*N,N’*-bis(4-chlorobutyl)imidazolidin-2-one (1.45 g, 2.86 mmol) in DMF (10 mL) was added. The reaction mixture was stirred at room temperature for 40 h. The reaction was quenched with water, and the organic compounds were extracted with ethyl acetate. The combined organic layer was dried over MgSO4 and concentrated. The residue was purified by column chromatography on silica gel (CH2Cl2: CH3OH = 9:1) to give product (1.32 g, 90%) as oil.

[α]25D = +13.0 (*c* = 1.50 in chloroform);  1H NMR (300 MHz, CDCl3) δ 1.44 (m, 4H), 1.63 (m, 4H), 2.32 (s, 6H), 3.09 (dt, *J* = 6.2, 14.2 Hz, 2H) 3.36-3.46 (m, 8H), 3.74 (t, *J* = 7.1 Hz, 4H), 4,48 (s, 4H), 6.73 (d, *J* = 1.1 Hz, 2H), 6.87 (d, *J* = 1.1 Hz, 2H), 7.25-7.36 (m, 10H); 13C NMR (75.5 MHz, CDCl3) δ 12.9, 24.5, 27.4, 41.0, 45.2, 55.8, 70.6, 73.3, 118.9, 126.8, 127.5, 127.8, 128.3, 137.4, 144.2, 160.1; HRMS Calcd. for C35H47N6O3: 599.3710. Found 599.3708.

**(4*S*,5*S*)-4,5-Bis(hydroxymethyl)-*N,N’*-bis[4-(2-methylimidazol-1-yl)butyl]imidazolidin-2-one**

A solution of bisimidazole **4** (1.1 g, 2.36 mmol) in cyclohexene (14 mL) and ethanol (20 mL) was refluxed in the presence of 20% Pd(OH)2/C (0.5 g) for 10 h. After cooling to room temperature, the catalyst was filtered off through celite, and the filtrate was concentrated under reduced pressure. The residue was purified by column chromatography on silica gel (CH2Cl2: MeOH = 5:1) to give diol (0.65 g, 85%) as pale-yellowish oil.

[α]25D = -4.5 (*c* = 0.46 in methanol); 1H NMR (300 MHz, D2O) δ 1.35 (m, 4H), 1.54 (m, 4H), 2.18 (s, 6H), 2.92 (dt, *J* = 14.6, 5.7 Hz, 2H), 3.25 (dt, *J* = 14.6, 7.5 Hz, 2H), 3.36 (d, *J* = 11.1 Hz, 2H), 3.38 (s, 2H), 3.61 (d, *J* = 11.1 Hz, 2H), 3.77 (t, *J* = 6.9 Hz, 4H), 6.71 (s, 2H), 6.88 (s, 2H); 13C NMR (75.5 MHz, D2O) δ 11.8, 23.7, 27.1, 40.4, 45.5, 56.1, 59.8, 120.6, 125.5, 136.0, 162.0. HRMS Calcd. for C21H35N6O3: 419.2771, Found: 419.2779.

**(4*S*,5*S*)-4,5-Bis(methansulfonyloxymethyl)-*N,N’*-bis[4-(2-methylimidazol-1-yl)butyl]imidazolidin-2-one**

To a stirred solution of (4*S*,5*S*)-4,5-Bis(hydroxymethyl)-*N,N’*-bis[4-(2-methylimidazol-1-yl)butyl]imidazolidin-2-one (0.4 g, 0.96 mmol) and triethylamine (0.80 mL, 5.73 mmol) in methylene chloride (20 mL) was added methanesulfonyl chloride (0.22 mL, 2.87 mmol) at 0 oC. The reaction mixture was stirred at room temperature for 4 h. The reaction was quenched by addition of water at 0 oC, and the aqueous layer was extracted with methylene chloride (4 × 20 mL). The combined organic layer was dried over MgSO4, filtered,and the filtrate was concentrated. The residue was purified by column chromatography on silica gel (CH2Cl2: MeOH = 5:1) to give dimesylate product (0.48 g, 94%) as colorless oil.

[α]25D = +5.8 (*c* = 0.26 in methanol); 1H NMR (300 MHz, DMSO-d6) δ 1.40 (m, 4H), 1.53 (m, 4H), 2.39 (s, 6H), 3.05 (s, 6H), 3.08 (m, 2H), 3.49 (dt, *J* = 14.5, 7.5 Hz, 2H), 3.70 (m, 2H), 3.89 (t, *J* = 7.0 Hz, 4H), 4.20 (d, *J* = 3.6 Hz, 4H), 6.85 (d, *J* = 1.3 Hz, 2H), 6.91 (d, *J* = 1.2 Hz, 2H); 13C NMR (75.5 MHz, DMSO-d6) δ 9.3, 12.9, 24.8, 28.0, 37.6, 45.8, 49.4, 54.1, 69.0, 120.7, 125.5, 144.5, 159.7. HRMS Calcd. for C23H39N6O7S2: 575.2322. Found: 575.2333.

**(4*S*,5*S*)-4,5-Bis(diphenylphosphinomethyl)-*N,N’*-bis[4-(2-methylimidazol-1-yl)butyl]imidazolidin-2-one (5)**

To a solution of (4*S*,5*S*)-4,5-Bis(methansulfonyloxymethyl)-*N,N’*-bis[4-(2-methylimidazol-1-yl)butyl]imidazolidin-2-one(30 mg, 0.06 mmol) in THF and DMF (v/v = 10/1) was added potassium diphenylphosphide (0.36 mL of 0.5 M solution in THF, 0.18 mmol) at 0 oC and the reaction mixture was stirred at room temperature for 8 h. The precipitate was filtered off through celite and the filter cake was washed with benzene. The filtrate was evaporated and the residue was purified by column chromatography on silica gel (CH2Cl2: MeOH = 6:1) to give bisphosphine **5** (20 mg, 48%).

[α]25D = -17.7 (*c* = 0.48 in chloroform); 1H NMR (300 MHz, CDCl3) δ 1.28 (m, 4H), 1.61 (m, 4H,C), 2.17 (dd, *J* = 13.9, 7.8 Hz, 2H), 2.32 (s, 6H), 2.40 (dd, *J* = 13.9, 2.4 Hz, 2H), 2.65 (dt, *J* = 14.3, 6.2 Hz, 2H), 3.35 (dt, *J* = 14.3, 7.8 Hz, 2H), 3.66 (m, 2H), 3.72 (dd, *J* = 7.1, 1.5 Hz, 2H), 3.75 (dd, *J* = 7.2, 1.7 Hz, 2H), 6.74 (d, *J* = 1.1 Hz, 2H), 6.86 (d, *J* = 1.1 Hz, 2H), 7.27-7.42 (m 20H); 13C NMR (75.5 MHz, CDCl3) δ 12.94, 24.32, 27.68, 32.36, 32.55, 39.70, 45.29, 56.38, 56.57, 56.75, 118.8, 127.0, 128.5, 128.6, 128.7, 129.0, 132.6, 132.7, 132.8, 133.0, 137.3, 137.5, 137.6, 137.8, 144.2, 158.9; 31P NMR (121 MHz, CDCl3), δ –10.07. HRMS Calcd. for C45H53N6OP2: 755.3756. Found: 755.3755.

***In situ* formation of Rh-complex 1 and general procedure for asymmetric hydrogenation**

A mixture of **5** (2.8 mg, 3.7 x 10-3 mmol) and added [Rh(cod)2]BF4 (1.3 mg, 3.1 x 10-3 mmol) in methylene chloride (1 mL) was stirred for 30 min at rt, and then, trimethyloxonium tetrafluoroborate (1.1 mg, 7.4 x 10-3 mmol) was added and the mixture was stirred for 2 h. Evaporation of the volatiles provided a Rh-complex **1** [31P NMR (121 MHz, CDCl3), δ = 32.62 (d, 2JRh-P = 139.2 Hz)]. For hydrogenation, after evaporation of the volatiles, an ionic liquid, [bmim][SbF6](1 mL) and a solution of substrate (50 mg, 3.1 x 10-1 mmol) in *i*PrOH (2 mL) were added. The mixture was hydrogenated under 1 atmosphere of H2 pressure at room temperature for 1 h. To determine the conversion and enantioselectivity, the *i*PrOH layer separated, and subjected without any purification into GC equipped with CP-Chirasil-Dex-CB chiral column and 1H NMR. For catalyst recycling, a degassed solution of enamide in iPrOH was added again to the ionic liquid layer remained in reaction vessel.
